# Supplementary material for: Stem Cells for Cancer Therapy: Translating the Uncertainties and Possibilities of Stem Cell Properties into Opportunities for Effective Cancer Therapy
Source: MDPI journal article supplement (doi:10.3390/ijms24021012), 2023-01-05
Supplement: s1 [file s1]

*Review*

# **Stem Cells for Cancer Therapy: Translating the Uncertainties and Possibilities of Stem Cell Properties into Opportunities for Effective Cancer Therapy**

**Ahmed Faris Aldoghachi <sup>1</sup>, Zhi Xiong Chong <sup>2</sup>, Swee Keong Yeap <sup>3</sup>, Soon Keong Cheong <sup>4</sup>, Wan Yong Ho <sup>2</sup> and Alan Han Kiat Ong <sup>1,\*</sup>**

<sup>1</sup> M. Kandiah Faculty of Medicine and Health Sciences, Universiti Tunku Abdul Rahman, Cheras 43000, Malaysia

<sup>2</sup> Division of Biomedical Sciences, School of Pharmacy, Faculty of Sciences and Engineering, University of Nottingham Malaysia, Semenyih 43500, Malaysia

<sup>3</sup> China-ASEAN College of Marine Sciences, Xiamen University Malaysia, Sepang 43900, Malaysia

<sup>4</sup> National Cancer Council (MAKNA), Kuala Lumpur 54000, Malaysia

\* Correspondence: onghk@utar.edu.my

---

**Table S1:** Roles of circulating CSC-regulating miRNAs in modulating cancer cell stemness and its linkage to disease progression and prognosis (n=28).

| Cancer type          | miRNA                                 | Targets                                         | Study model<br>(miRNA source)                 | Effects on cancer<br>stemness | Effects on disease staging | Effects on cancer<br>therapy | Effects on sur-<br>vival or re-<br>lapse | Ref   |
|----------------------|---------------------------------------|-------------------------------------------------|-----------------------------------------------|-------------------------------|----------------------------|------------------------------|------------------------------------------|-------|
| Breast cancer        | miR-130a-3p                           | ↓ RAB5B                                         | Clinical (Blood<br>exosomes)                  | ↓ Stemness                    | ↓ Staging and metastases   | NIA                          | NIA                                      | [104] |
| Breast cancer        | miR-155                               | ↑ BMI1<br>↑ SLUG<br>↑ SNAIL<br>↑ SOX9<br>↑ EZH2 | <i>In vitro</i><br>(Exosomes)                 | ↑ Stemness                    | ↑ Metastases               | ↑ Chemoresistance            | NIA                                      | [94]  |
| Breast cancer        | miR-93-3p<br>miR-105                  | ↓ SFRP1                                         | Clinical<br>(Plasma)                          | ↑ Stemness                    | ↑ Staging and metastases   | ↑ Chemoresistance            | ↓ Survival                               | [103] |
| Breast cancer        | miR-9-5p<br>miR-195-5p<br>miR-203a-3p | ↓ ONECUT2                                       | <i>In vitro</i> (Extra-<br>cellular vesicles) | ↑ Stemness                    | NIA                        | ↑ Chemoresistance            | NIA                                      | [92]  |
| Colorectal<br>cancer | miR-17-5p                             | ↓ SPOP<br>↑ PD-L1                               | <i>In vitro</i><br>(Exosomes)                 | ↑ Stemness                    | NIA                        | NIA                          | NIA                                      | [122] |
| Colorectal<br>cancer | miR-19b                               | ↓ FBXW7                                         | <i>In vitro</i><br>(Exosomes)                 | ↑ Stemness                    | NIA                        | ↑ Radioresistance            | NIA                                      | [93]  |
| Colorectal<br>cancer | miR-146a-5p                           | ↓ NUMB                                          | <i>In vitro</i><br>(Exosomes)                 | ↑ Stemness                    | NIA                        | NIA                          | NIA                                      | [107] |

|                   |                                                                 |                                                            |                                                                  |            |   |            |                   |            |       |
|-------------------|-----------------------------------------------------------------|------------------------------------------------------------|------------------------------------------------------------------|------------|---|------------|-------------------|------------|-------|
| Colorectal cancer | miR-375-3p                                                      | ↓<br>↓<br>↓<br>↓<br>B-catenin<br>Vimentin<br>ZEB1<br>SNAIL | <i>In vitro</i><br>(Exosomes)                                    | ↓ Stemness |   | NIA        | NIA               | NIA        | [105] |
| Colorectal cancer | miR-30a<br>miR-222                                              | ↓ MIA3                                                     | <i>In vitro</i><br>(Exosomes)                                    | ↑ Stemness | ↑ | Metastases | NIA               | NIA        | [108] |
| Gastric cancer    | miR-500a-3p                                                     | ↓ FBXW7                                                    | Clinical<br>(Plasma) and <i>in vitro</i><br>(Exosomes)           | ↑ Stemness | ↑ | Staging    | ↑ Chemoresistance | ↓ Survival | [90]  |
| Glioblastoma      | miR-30b-3p                                                      | ↓ RHOB                                                     | Clinical (Serum) and <i>in vitro</i><br>(Extracellular vesicles) | ↑ Stemness | ↑ | Grading    | ↑ Chemoresistance | ↓ Survival | [111] |
| Glioblastoma      | miR-504                                                         | ↓ GRB10                                                    | <i>In vitro</i> (Extracellular vesicles)                         | ↓ Stemness | ↓ | Grading    | NIA               | ↑ Survival | [98]  |
| Glioblastoma      | miR-603                                                         | ↓<br>↓<br>IGF1<br>IGF1R                                    | <i>In vitro</i> (Extracellular vesicles)                         | ↓ Stemness |   | NIA        | ↓ Radioresistance | ↑ Survival | [100] |
| Glioblastoma      | miR-9-5p miR-124-3p                                             | ↓ VIM                                                      | <i>In vitro</i> (Extracellular vesicles)                         | ↑ Stemness |   | NIA        | NIA               | ↓ Survival | [123] |
| Glioblastoma      | miR-16-5p<br>miR-23a-3p<br>miR-144-3p<br>miR-155-5p<br>miR-320e | ↓ PTEN                                                     | <i>In vitro</i><br>(Extracellular vesicles)                      | ↑ Stemness | ↑ | Metastases | ↑ Radioresistance | ↓ Survival | [91]  |

|                                           |                                                                                   |                                                      |                                                         |            |                          |                   |            |       |  |
|-------------------------------------------|-----------------------------------------------------------------------------------|------------------------------------------------------|---------------------------------------------------------|------------|--------------------------|-------------------|------------|-------|--|
|                                           | miR-363-3p<br>miR-495-3p<br>miR-520f-3p                                           |                                                      |                                                         |            |                          |                   |            |       |  |
| Liver cancer                              | miR-1246                                                                          | ↓ AXIN2<br>↓ GSK-3β                                  | Clinical<br>(Plasma)                                    | ↑ Stemness | ↑ Metastases             | ↑ Chemoresistance | ↓ Survival | [96]  |  |
| Liver cancer                              | miR-125a<br>miR-125b                                                              | ↓ CD90                                               | <i>In vitro</i><br>(Exosomes)                           | ↓ Stemness | ↓ Metastases             | NIA               | ↓ Survival | [95]  |  |
| Oral squa-<br>mous cell<br>carcinoma      | miR-21<br>miR-34                                                                  | NIA                                                  | <i>In vitro</i><br>(Exosomes)                           | ↓ Stemness | NIA                      | NIA               | NIA        | [116] |  |
| Pancreas                                  | miR-210                                                                           | ↑ mTOR                                               | <i>In vitro</i><br>(Exosomes)                           | ↑ Stemness | ↑ Invasion               | ↑ Chemoresistance | NIA        | [101] |  |
| Lung cancer                               | miR-210-3p                                                                        | ↓ FGFR1                                              | <i>In vitro</i><br>(Exosomes)                           | ↑ Stemness | ↑ Metastases             | NIA               | NIA        | [97]  |  |
| Clear cell re-<br>nal cell carci-<br>noma | miR-19b-3p                                                                        | ↓ PTEN                                               | Clinical (Blood)<br>and <i>in vitro</i> (Ex-<br>osomes) | ↑ Stemness | ↑ Staging and metastases | NIA               | NIA        | [113] |  |
| Prostate can-<br>cer                      | miR-139-5p<br>miR-148a-3p<br>miR-183-5p<br>miR-1307-3p<br>miR-1307-5p<br>miR-7641 | ↑ miR-139-5p<br>MMP-2,<br>MMP-9,<br>MMP-13,<br>RANKL | <i>In vitro</i><br>(Exosomes)                           | ↑ Stemness | ↑ Metastases             | NIA               | NIA        | [99]  |  |

|                                       |            |                                           |                                                 |                   |     |     |                                                                             |       |
|---------------------------------------|------------|-------------------------------------------|-------------------------------------------------|-------------------|-----|-----|-----------------------------------------------------------------------------|-------|
| Multiple myeloma                      | miR-1305   | <p>↓ MDM2</p> <p>↓ IGF1</p> <p>↓ FGF2</p> | Clinical (blood) and <i>in vitro</i> (Exosomes) | <p>↓ Stemness</p> | NIA | NIA | <p>↑ Exosomal miR-1305</p> <p>↓ cellular miR-1305 and led to ↓ survival</p> | [117] |
| Acute myeloid leukemia                | miR-9      | <p>↓ HES1</p>                             | Clinical (Blood)                                | <p>↑ Stemness</p> | NIA | NIA | NIA                                                                         | [118] |
| Acute myeloid leukemia                | miR-34c-5p | <p>↓ RAB27B</p>                           | Clinical (blood) and <i>in vitro</i> (Exosomes) | <p>↓ Stemness</p> | NIA | NIA | <p>↑ Survival</p>                                                           | [119] |
| Myelodysplastic syndrome and leukemia | miR-22     | <p>↓ TET2</p>                             | Clinical (Blood)                                | <p>↑ Stemness</p> | NIA | NIA | <p>↓ Survival</p>                                                           | [120] |

Abbreviation: NIA: no information available.
